# Supplementary material for: RNase H2 catalytic core Aicardi-Goutières syndrome–related mutant invokes cGAS–STING innate immune-sensing pathway in mice
Source: PubMed Central journal article supplement — J Exp Med. 2016 Mar 7;213(3):329–36. doi: 10.1084/jem.20151464 (PMC4813680; doi:10.1084/jem.20151464), 2016-03-07
Supplement: supp_jem.20151464_JEM_20151464_sm.pdf [file supp_jem.20151464_JEM_20151464_sm.pdf]

SUPPLEMENTAL MATERIAL

Pokatayev et al., <http://www.jem.org/cgi/content/full/jem.20151464/DC1>

Table S1, available as an Excel file, shows RNA-seq data from E18.5 MEFs

Table S2. shRNA oligo sequence

| Gene name                     | Oligo sequence (5' to 3')                                        |
|-------------------------------|------------------------------------------------------------------|
| CGAS Fwd                      | ACGAGAGCCGTTTTATCTCGTACCC                                        |
| CGAS Rev                      | TGTCGGGAAGATTCACAGCATGTTT                                        |
| STING Fwd                     | TCAGTGGTGCAGGGAGCCGA                                             |
| STING Rev                     | CGCCTGCTGGCTGTCCGTTC                                             |
| MAVS Fwd                      | CCTCCGGGGACCTCACTCCG                                             |
| MAVS Rev                      | TGGGGACTCTGGTGGCTGGG                                             |
| TBK1 Fwd                      | CCAGTGGATGTTCAAATGAGAGAAT                                        |
| TBK1 Rev                      | TCTAGAACAGTGTATAAACTCCAC                                         |
| CXCL10 Fwd                    | GGGATCCCTCTCGAAGGACGGTCC                                         |
| CXCL10 Rev                    | ACGCTTTCATTAATTTCTTGATGGT                                        |
| IFIT1 Fwd                     | ACGCTTTCATTAATTTCTTGATGGT                                        |
| IFIT1 Rev                     | TGCTCAGCTGCTCGCTCTGGATCAA                                        |
| RSAD2 Fwd                     | AACCTGCTCATCGAAGCTGT                                             |
| RSAD2 Rev                     | ATAGTGAGCAATGGCAGCCT                                             |
| IFIT3 Fwd                     | TGGCCTACATAAAGCACCTAGATGG                                        |
| IFIT3 Rev                     | CGCAAACTTTTGGCAAACCTGTCT                                         |
| LINE-1 5' UTR Fwd             | GGCGAAAGGCCAAACGTAAGA                                            |
| LINE-1 5' UTR Rev             | GGAGTGCTGCGTTCTGATGA                                             |
| LINE-1 ORF2 Fwd               | GGAGGGACATTTTCATTCTCATCA                                         |
| LINE-1 ORF2 Rev               | GCTGCTCTTGATTTGGAGCATAGA                                         |
| Sh-Control (Luciferase) sense | CCGG AACTTACGCTGAGTACTTCTCGA CTCGAG TCGAAGTACTCAGCGTAAGTT TTTTTG |
| Sh-Control (Luciferase) as    | AATTCAAAAAACTTACGCTGAGTACTTCTCGACTCGAGTCTCGAAGTACTCAGCGTAAGTT    |
| Sh-mcGAS sense                | CCGG AGGATTGAGCTACAAGAATAT CTCGAG ATATTCTGTAGCTCAATCCT TTTTTG    |
| Sh-mcGAS as                   | AATTCAAAAAGGATTGAGCTACAAGAATATCTCGAGATATTCTGTAGCTCAATCCT         |
| Sh-mSting sense               | CCGGCAACATTCCGATTCCGAGATATCTCGAGATATCTCGAATCGAATGTTGTTTTTG       |
| Sh-mSting as                  | AATTCAAAAACAACATTCCGATTCCGAGATATCTCGAGATATCTCGAATCGAATGTTG       |
| Sh-mTBK1 sense                | CCGGCCAGAATCAGAATTTCTATTCTCGAGAATGAGAAATTTCTGATTCTGGTTTTTG       |
| Sh-mTBK1 as                   | AATTCAAAAACCAGAATCAGAATTTCTATTCTCGAGAATGAGAAATTTCTGATTCTGG       |
| Sh-mMavs sense                | CCGGGCTCTTTGATACCCTCTCCTACTCGAGTAGGAGAGGGTATCAAAGAGCTTTTTG       |
| Sh-mMavs as                   | AATTCAAAAAGCTCTTTGATACCCTCTCCTACTCGAGTAGGAGAGGGTATCAAAGAGC       |

All oligos were synthesized by Sigma-Aldrich and subsequently cloned into pLKO.1 (Addgene). Quantitative PCR primers of ISGs and control genes were previously published (Hasan et al., 2013).

REFERENCE

Hasan, M., J.Koch, D.Rakheja, A.K.Pattnaik, J.Brugarolas, I.Doarmorov, B.Levine, E.K.Wakeland, M.A.Lee-Kirsch, and N.Yan. 2013. Trex1 regulates lysosomal biogenesis and interferon-independent activation of antiviral genes. *Nat. Immunol.* 14:61–71. <http://dx.doi.org/10.1038/ni.2475>
